# Supplementary material for: Adiponectin inhibits LPS-induced nucleus pulposus cell pyroptosis through the miR-135a-5p/TXNIP signaling pathway
Source: Aging (Albany NY). 2023 Dec 2;15(23):13680–92. doi: 10.18632/aging.205226 (PMC10756118; doi:10.18632/aging.205226)
Supplement: Supplementary Table 1 [file aging-15-205226-s001.pdf]

## SUPPLEMENTARY TABLE

**Supplementary Table 1. Summary of clinical and demographic features of patients.**

| Subject number       | Gender | Age (years) | Level | Pfirschmann grading |
|----------------------|--------|-------------|-------|---------------------|
| Normal control group |        |             |       |                     |
| 1                    | Male   | 18          | L1/2  | II                  |
| 2                    | Male   | 16          | L4/5  | II                  |
| 3                    | Female | 20          | L2/3  | II                  |
| 4                    | Male   | 21          | L2/3  | II                  |
| 5                    | Male   | 19          | L4/5  | II                  |
| 6                    | Male   | 24          | L3/4  | II                  |
| 7                    | Female | 22          | L3/4  | II                  |
| 8                    | Male   | 23          | L4/5  | II                  |
| 9                    | Female | 25          | L2/3  | II                  |
| 10                   | Female | 18          | L4/5  | II                  |
| IDD group            |        |             |       |                     |
| 1                    | Male   | 57          | L4/5  | IV                  |
| 2                    | Male   | 40          | L5/S1 | V                   |
| 3                    | Female | 45          | L4/5  | V                   |
| 4                    | Female | 60          | L4/5  | IV                  |
| 5                    | Male   | 55          | L3/4  | IV                  |
| 6                    | Female | 54          | L4/5  | IV                  |
| 7                    | Female | 57          | L5/S1 | V                   |
| 8                    | Male   | 48          | L5/S1 | IV                  |
| 9                    | Female | 58          | L3/4  | IV                  |
| 10                   | Male   | 51          | L4/5  | V                   |
